# Supplementary material for: Natural and synthetic avenanthramides activate caspases 2, 8, 3 and downregulate hTERT, MDR1 and COX-2 genes in CaCo-2 and Hep3B cancer cells
Source: Royal Society of Chemistry journal article supplement (doi:10.1039/c7fo01804e), 2018-01-01
Supplement: c7fo01804e1.pdf [file c7fo01804e1.pdf]

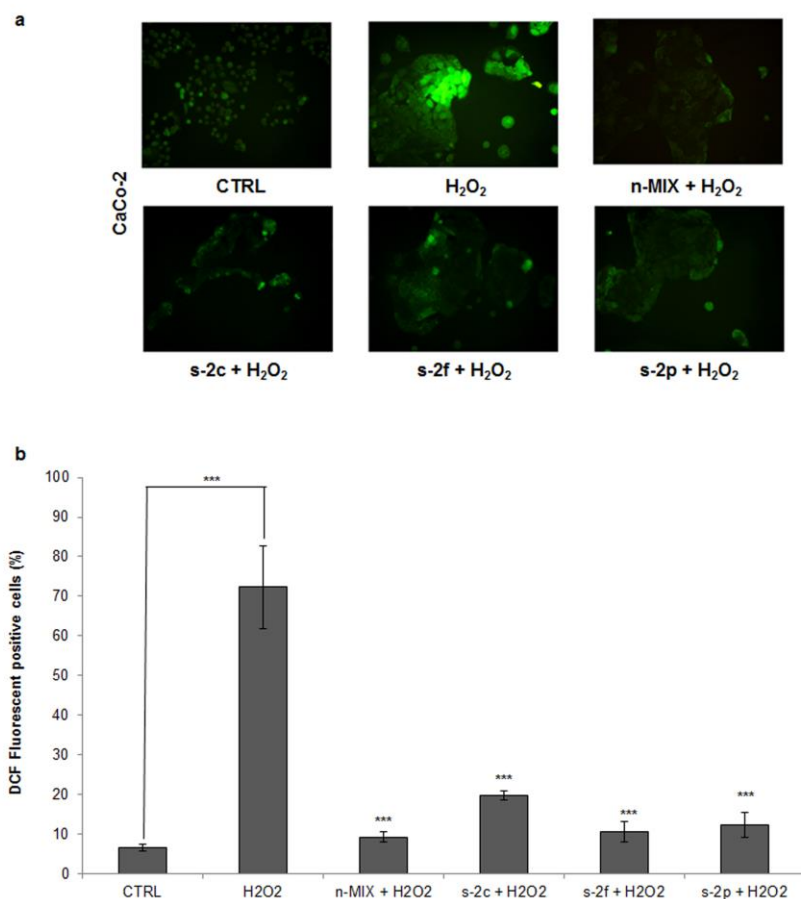

**Fig 1 ESI. a)** Representative images of DCFH-DA assay in CaCo-2 cells treated with natural and synthetic AVNs before H<sub>2</sub>O<sub>2</sub> treatment. CTRL, untreated cells; H<sub>2</sub>O<sub>2</sub>, cells treated with 1 mM H<sub>2</sub>O<sub>2</sub> for 1h; n-MIX + H<sub>2</sub>O<sub>2</sub>, cells treated with 110 μM n-MIX for 24h and then with 1 mM H<sub>2</sub>O<sub>2</sub> for 1h; s-2c + H<sub>2</sub>O<sub>2</sub>, cells treated with 110 μM s-2c for 24h and then with 1 mM H<sub>2</sub>O<sub>2</sub> for 1h; AVN s-2f + H<sub>2</sub>O<sub>2</sub>, cells treated with 110 μM s-2f for 24h and then with 1 mM H<sub>2</sub>O<sub>2</sub> for 1h; s-2p + H<sub>2</sub>O<sub>2</sub>, cells treated with 110 μM s-2p for 24h and then with 1 mM H<sub>2</sub>O<sub>2</sub> for 1h. **b)** Three fields per sample were analyzed and each time at least 100 cells were counted; two independent experiments were performed (n = 6) and results were expressed as % DCF fluorescent positive cells versus control; \*\*\*p < 0.001.
